# Supplementary material for: Combination venetoclax and selinexor effective in relapsed refractory multiple myeloma with translocation t(11;14)
Source: PubMed Central journal article supplement (PMC9581939; doi:10.1038/s41698-022-00315-2), 2022-10-19

**From Figure 2F**

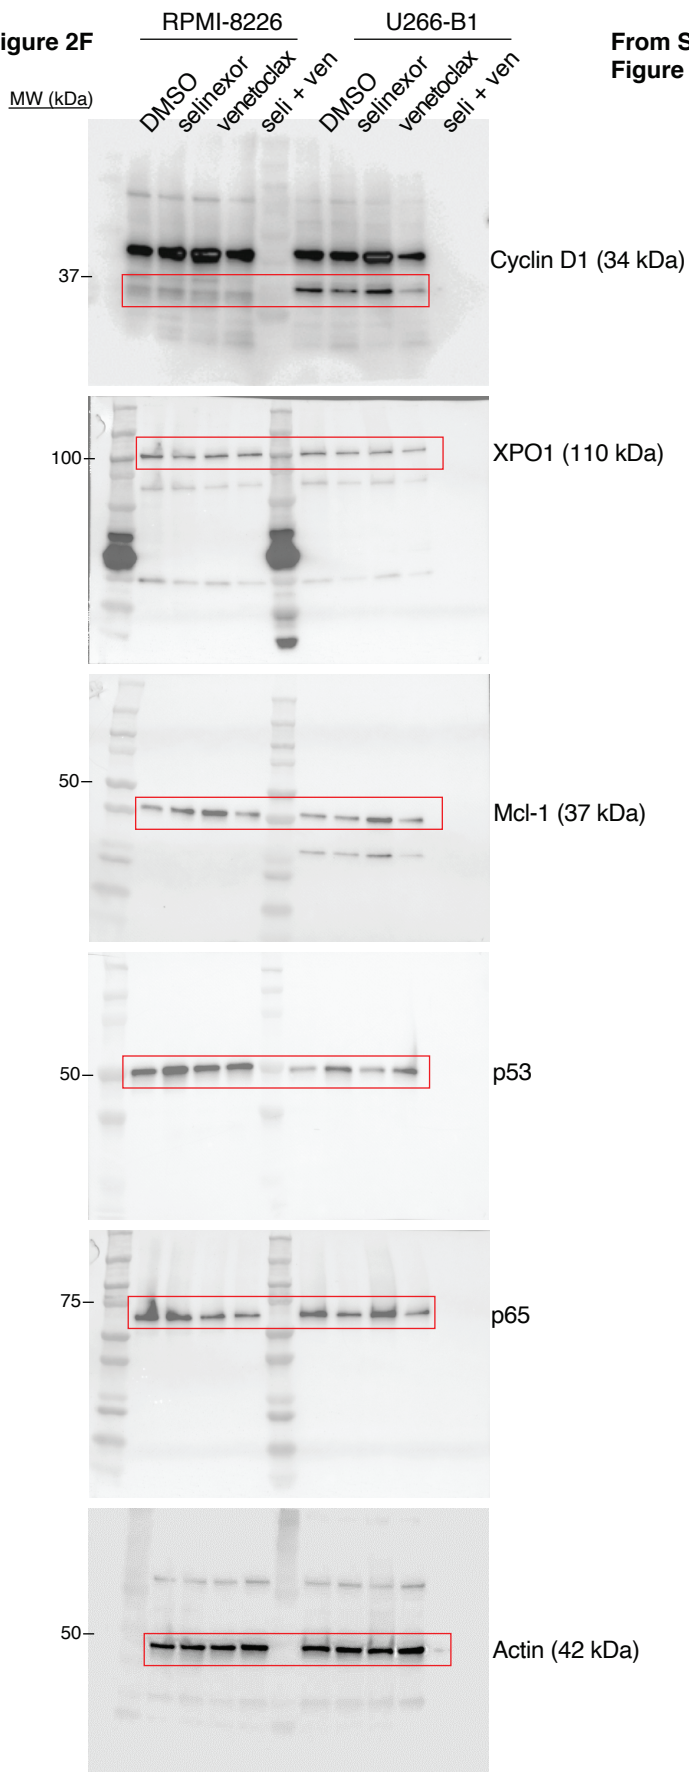

**From Supplementary Figure 1F**

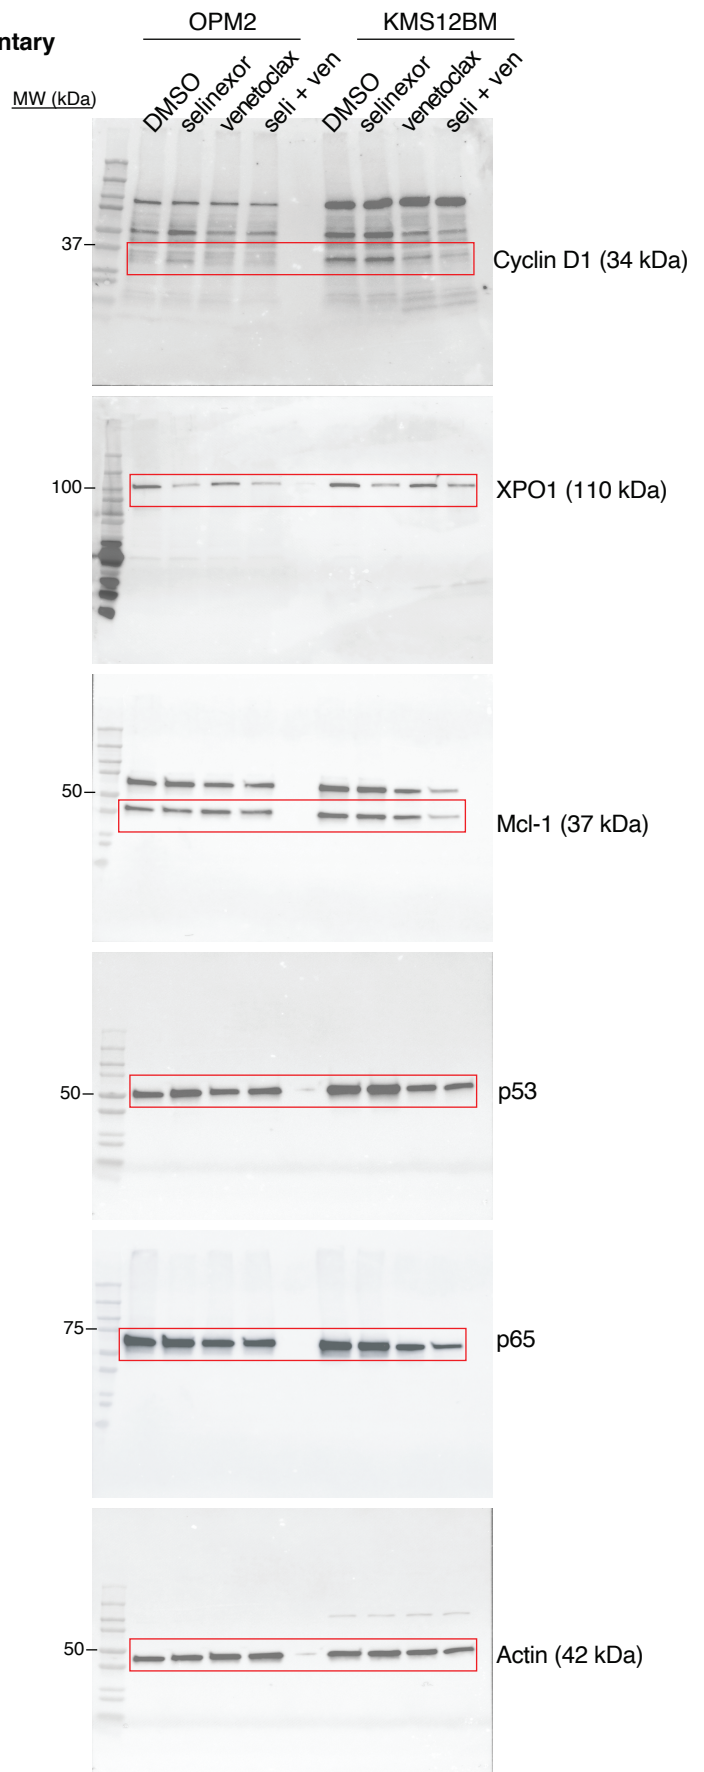

Supplement: 41698_2022_315_MOESM2_ESM.pdf [file 41698_2022_315_MOESM2_ESM.pdf]
